# Supplementary material
Source: PubMed Central journal article supplement (PMC6462502)

# Supporting Information

## Supporting experimental procedures

### *Yeast growth conditions*

To prepare SCA medium, 0.5% Bacto™ Casamino Acid (Difco) was added to YNB medium.

**Supporting Figure S1.** Other nutrients except glucose and ethanol have no major impact on yeast growth in this study's condition. (A) Wild-type cells were inoculated into SCA medium, which contain only casamino acids as carbon sources, at a starting OD<sub>600</sub> of 0.01, and cultured in an automatically recording incubator. The OD<sub>600</sub> of the culture was measured every 10 minutes. Each result represents the mean ± S.E. ( $n = 6$ ). Plots of OD<sub>600</sub> (grey plots and line) which are derived from Fig. 1B are depicted for comparison. (B) Ammonium concentration of the SD<sub>0.2</sub>CA medium before or after cultivation were measured. To prepare after cultivation medium, wild-type cells were inoculated into SD<sub>0.2</sub>CA medium at a starting OD<sub>600</sub> of 0.01, cultured for 48 hours, and collected the supernatant by centrifugation. Each bar represents mean ± S.E. ( $n = 3$ ). (C) Wild-type cells were inoculated into SD<sub>0.2</sub>CA medium (SD<sub>0.2</sub>CA (1x NH<sub>4</sub><sup>+</sup>)) or SD<sub>0.2</sub>CA medium supplemented with 5 g/L ammonium sulfate (SD<sub>0.2</sub>CA (2x NH<sub>4</sub><sup>+</sup>)) at a starting OD<sub>600</sub> of 0.01. After 48 h-cultivation, OD<sub>600</sub> was measured. Each bar represents mean ± S.E. ( $n = 5$ ).

**Supporting Figure S2.** Vacuolar membrane with LD was invaginated into the vacuolar lumen. Wild-type cells were cultured for 22 hours (ethanol-utilizing) in SD<sub>0.2</sub>CA medium. Images were acquired by transmission electron microscopy. Arrowheads indicate LDs associated with the vacuolar lumen. Bars: 1 μm.

**Supporting Movie S1.** Autophagic bodies were observed during ethanol-utilizing and ethanol-depleted phases. *atg15Δ* and *atg2Δatg15Δ* cells expressing GFP-Atg8 were inoculated into SD<sub>0.2</sub>CA medium at a starting OD<sub>600</sub> of 0.01, and then cultured for 10 hours (glucose-utilizing), 22 hours (ethanol-utilizing), or 46 hours (ethanol-depleted). The cells were observed by fluorescence microscopy. Images were sequentially acquired (exposure time: 32 milliseconds). Movies were re-constructed using these images (0.5 × play speed). Bars: 5 μm.

**Supporting Movie S2** LDs are incorporated into the vacuolar lumen. Wild-type cells were cultured for 52 hours in SD<sub>0.2</sub>CA medium. Cells were stained with BODIPY and observed under a fluorescence microscope. Images were sequentially acquired (exposure time: 32 milliseconds). Movies were re-constructed using these images (0.5 × play speed). Bar: 5 μm.

# Figure S1

## A

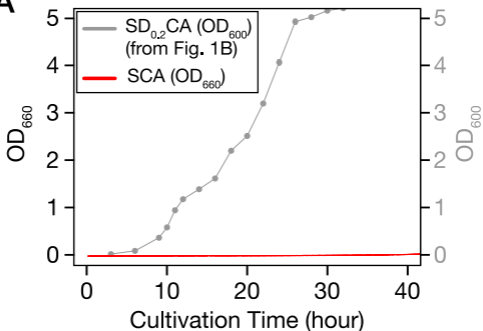

## B

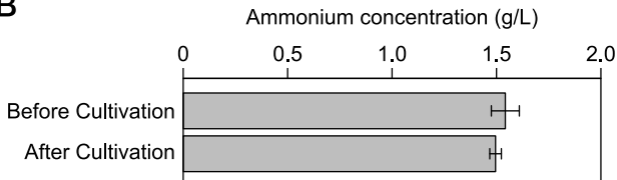

## C

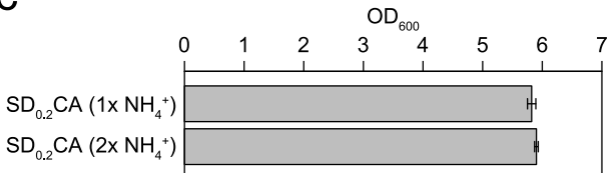

**Figure S2**

Ethanol-utilizing

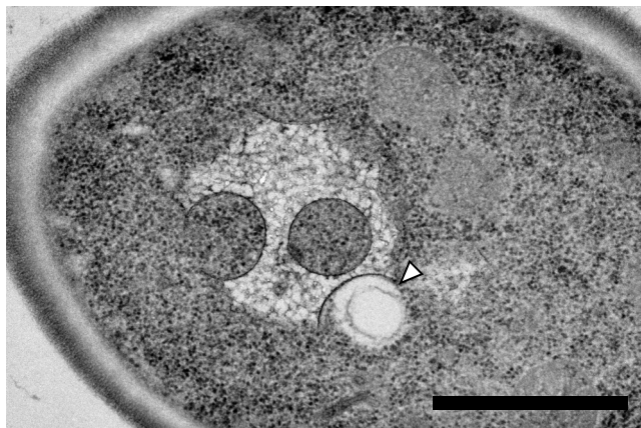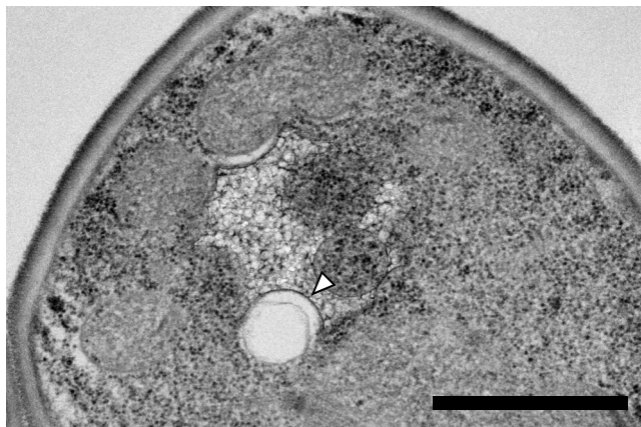

Supplement: supp_RA118.005698_140577_3_supp_283742_pmrq9n.pdf [file supp_RA118.005698_140577_3_supp_283742_pmrq9n.pdf]
